# Supplementary material for: Self-assembly of noble metal-free graphene–copper plasmonic metasurfaces
Source: Royal Society of Chemistry journal article supplement (doi:10.1039/d0tc02848g), 2020-01-01
Supplement: d0tc02848g1.pdf [file d0tc02848g1.pdf]

## Supplementary Information

# Self-Assembly of Noble Metal-Free Graphene- Copper Plasmonic Metasurfaces

*Iolanda Di Bernardo,<sup>‡†Δ</sup> Jonathan Bradford,<sup>§1Δ</sup> Zelio Fusco,<sup>‡</sup> Jireh Mendoza,<sup>‡</sup> Thanh Tran-Phu,<sup>‡</sup>  
Renheng Bo,<sup>‡</sup> Nunzio Motta,<sup>§</sup> Antonio Tricoli<sup>‡\*</sup>*

<sup>‡</sup>Nanotechnology Research Laboratory, Research School of Electrical, Energy and Materials  
Engineering, The Australian National University, Canberra, ACT 2601, Australia.

<sup>†</sup>Australian Research Council Centre of Excellence in Future Low-Energy Electronics  
Technologies, Monash University, Clayton, Victoria 3800 Australia.

<sup>§</sup>School of Chemistry and Physics, Centre for Materials Science, Queensland University of  
Technology, Brisbane 4001, QLD, Australia.

<sup>||</sup> School of Physics & Astronomy, University of Nottingham, Nottingham, NG7 2RD, United  
Kingdom

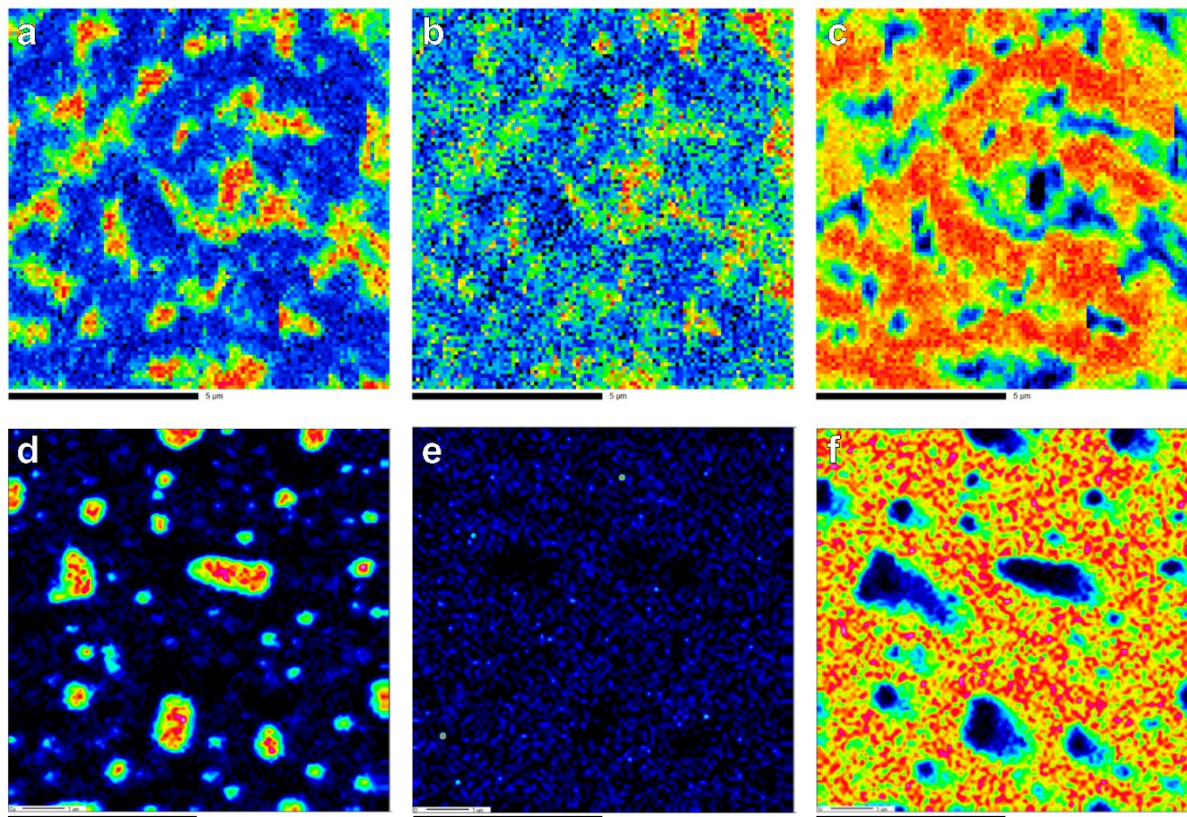

**Figure S1.** WDS mappings of a 2.7  $\mu$ m thickness sample before (top row) and after (bottom row) graphene growth. Panels a) and d): Cu-L $\alpha$  signal; b) and e): O-K $\alpha$  signal; c) and f): Si signal. Scalebar: 5  $\mu$ m

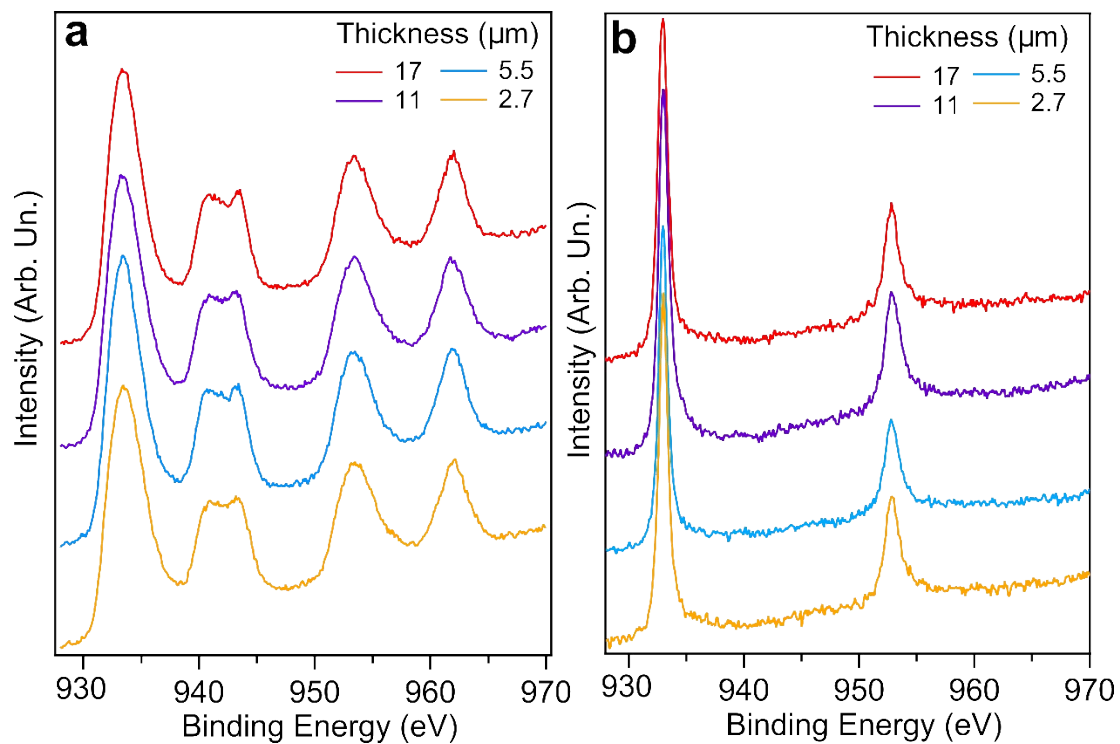

**Figure S2:** Photoemission spectra from Cu2p core level for all samples reported in the main text. (a) Spectra from the CuO films, as grown, on Si substrate. (b) Spectra for all samples after conversion and graphene growth. Samples grown on quartz for sensing measurements.

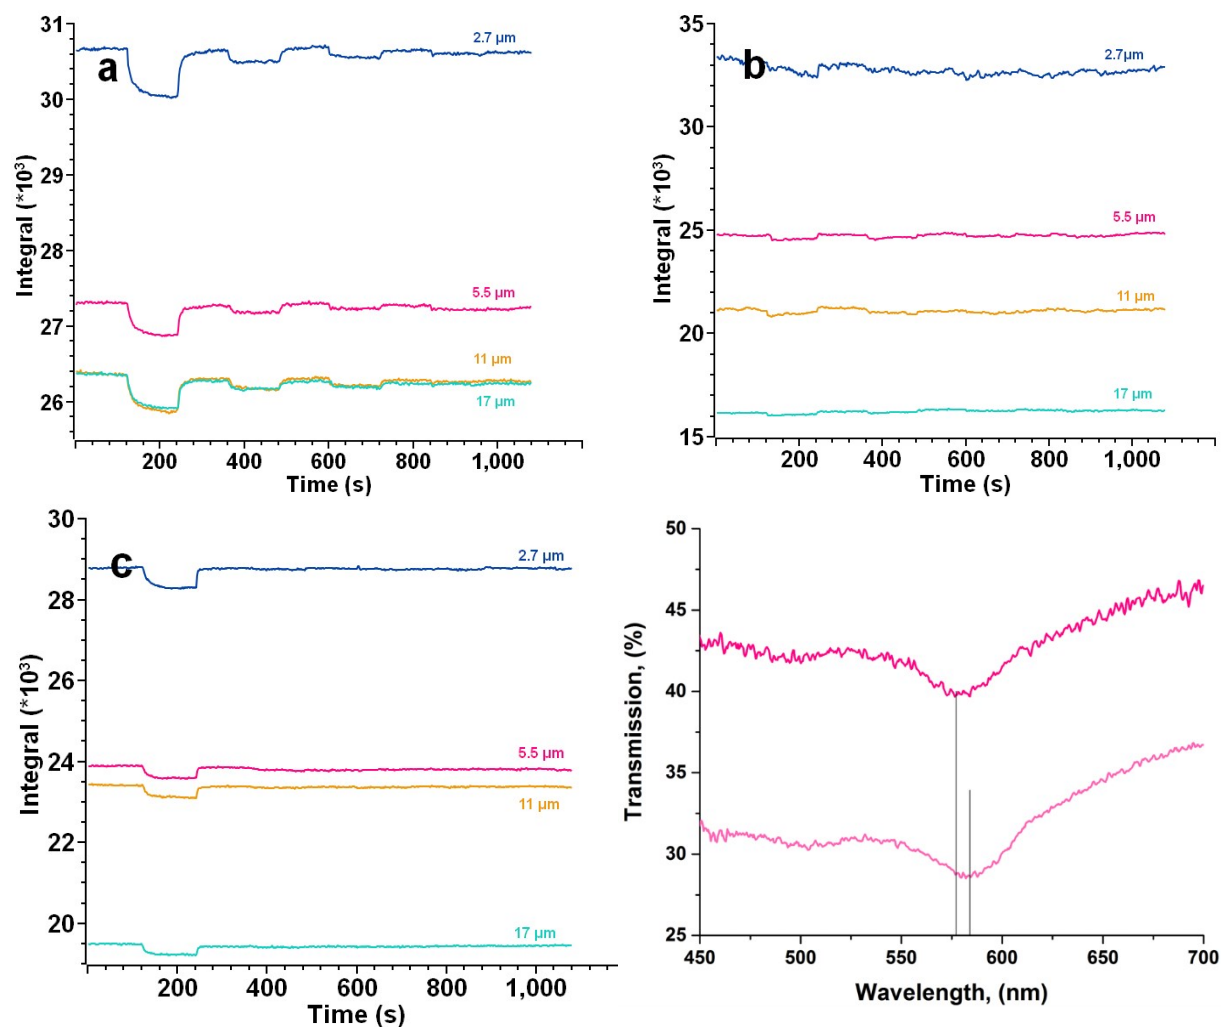

**Figure S3:** Plasmonic response for all samples for different volatile compounds, obtained via the integral method.<sup>1</sup> (a) decreasing concentration of toluene; (b) ethanol; (c) acetone. (d) Transmittance of the 5.5  $\mu\text{m}$  thickness sample before and after 90 days of air exposure.

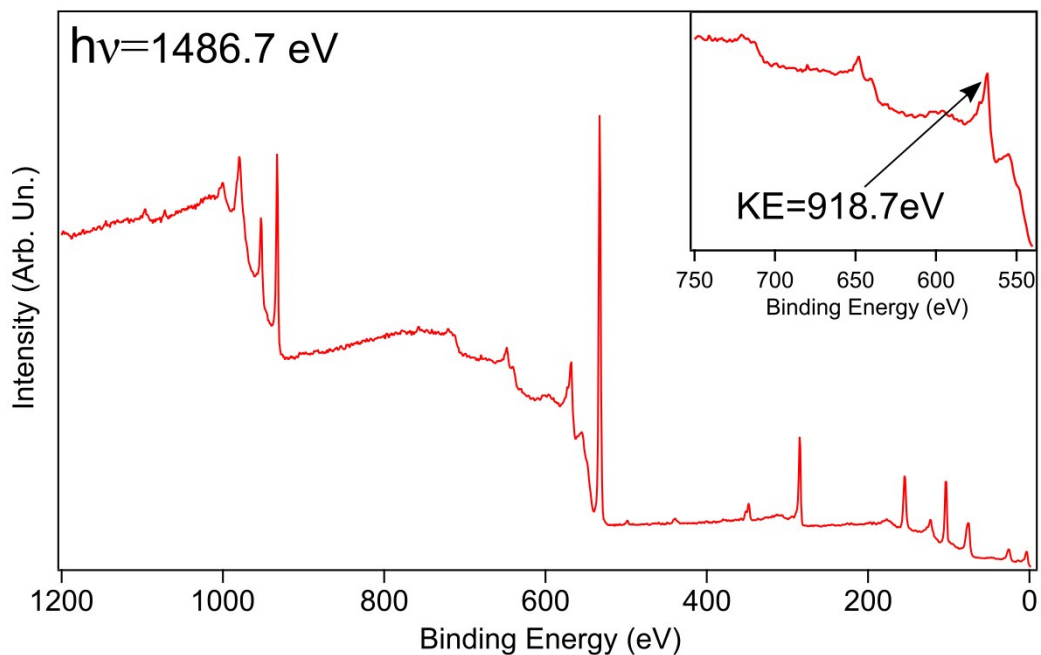

**Figure S4:** Survey x-ray photoelectron spectroscopy data of the graphene-coated Cu nanoparticles, for the sample with initial thickness 2.7  $\mu\text{m}$ , acquired at a photon energy  $h\nu=1486.7$  eV. Inset: Close-up on the Cu LMM Auger edge.

| <b>Initial CuO thickness</b> | <b>LSPR minimum</b> |
|------------------------------|---------------------|
| 2.7                          | 573.4               |
| 5.5                          | 568.8               |
| 11                           | 574.2               |
| 17                           | 570.4               |

**Table S1:** Position of the LSPR minimum as a function of initial CuO thickness for all samples. The curves were fitted with a Gaussian lineshape, on a wavelength span of  $\pm 12.5$  nm around the estimated position of the minimum.

## References

1. M.G. Manera, J. Spadavecchia, D. Buso, C. de Julian Fernandez, G. Mattei, A. Martucci, P. Mulvaney, J. Perez-Juste, R. Rella, L. Vasanelli, P. Mazzoldi, *Sens. Actuators B*, **2008**, *132*, 107; b) B. Zeng, Y. Gao, F. J. Bartoli, *Appl. Phys. Lett*, **2014**, *105*, 161106.
